# Supplementary material for: Nickel doped copper ferrite NixCu1−xFe2O4 for a high crystalline anode material for lithium ion batteries
Source: Royal Society of Chemistry journal article supplement (doi:10.1039/d0nj04429f), 2020-12-10
Supplement: d0nj04429f1.pdf [file d0nj04429f1.pdf]

**Electronic Supplementary Material (ESI) for New Journal of Chemistry**

**Nickel Doped Copper Ferrite  $\text{Ni}_x\text{Cu}_{1-x}\text{Fe}_2\text{O}_4$  as a High Crystalline Anode Material  
for Lithium Ion Batteries**

Adil Saleem,<sup>a,1</sup> Muhammad K. Majeed,<sup>b,1\*</sup> Shah-Iram Niaz,<sup>c</sup> M. Iqbal,<sup>c</sup> M. Akhlaq,<sup>c</sup> M.  
Zeeshan Ishfaq,<sup>a</sup> Yujun Zhang,<sup>a</sup> Hongyu Gong,<sup>a\*\*</sup>

<sup>a</sup> Key Laboratory for Liquid-Solid Structural Evolution and Processing of Materials,  
Ministry of Education, School of Material Science and Engineering, Shandong University,  
Jinan 250061, China. Email: [gong\\_honyu@163.com](mailto:gong_honyu@163.com)

<sup>b</sup> Key Lab of Colloid & Interface Chemistry, Ministry of Education, School of Chemistry &  
Chemical Engineering, Shandong University, 250100, Jinan, P. R. China.  
Email: [drmkashifmajeed@mail.sdu.edu.cn](mailto:drmkashifmajeed@mail.sdu.edu.cn).

<sup>c</sup> Institute of Chemical Sciences, Faculty of Pharmacy, Gomal University, D.I.Khan, 29050,  
Pakistan.

<sup>1</sup> These authors contributed equally to this work.

## Supporting Information

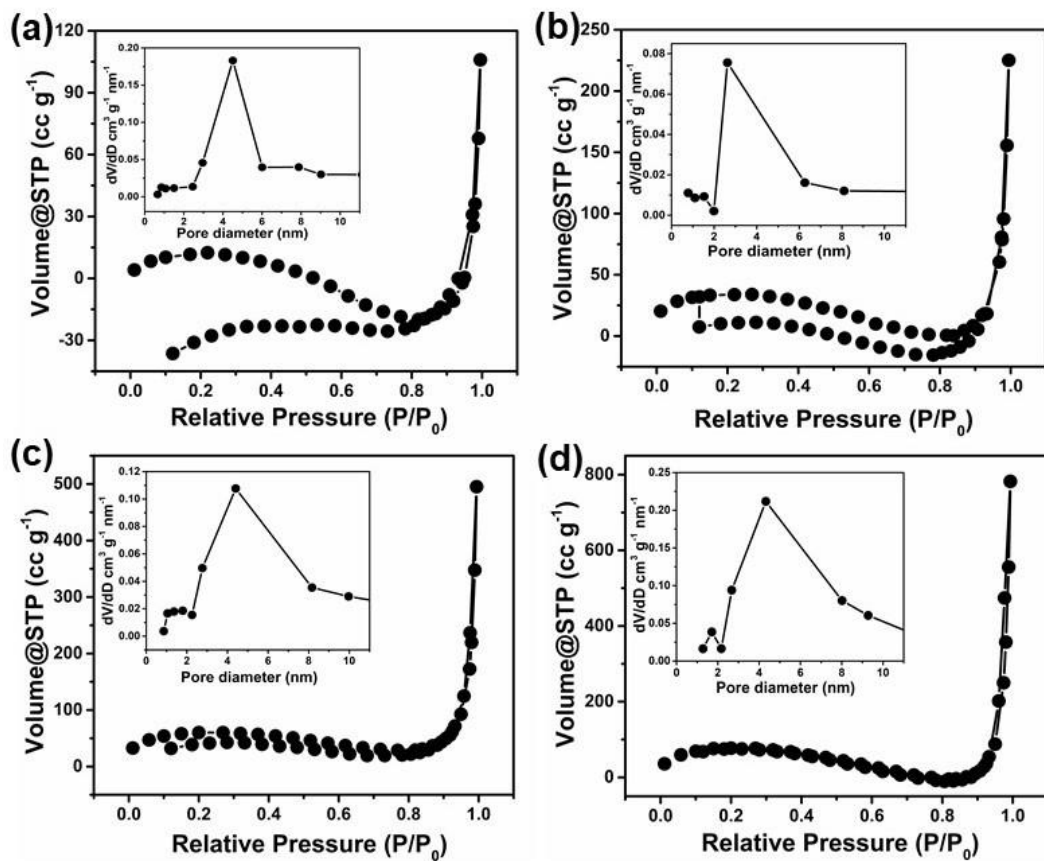

Figure S1: N<sub>2</sub> sorption isotherms (inset: pore size distribution) of Ni<sub>x</sub>Cu<sub>1-x</sub>Fe<sub>2</sub>O<sub>4</sub> (a)

NCF-1, (b) NCF-2, (c) NCF-3 and (d) NCF-4.

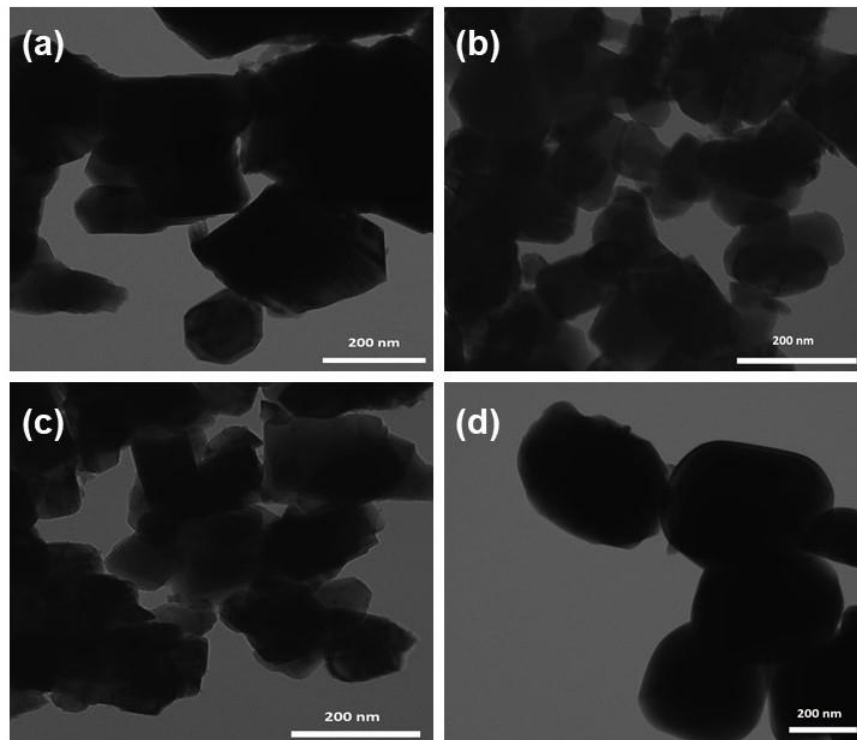

**Figure S2.** TEM images of  $\text{Ni}_x\text{Cu}_{1-x}\text{Fe}_2\text{O}_4$  (a) NCF-1, (b) NCF-2, (c) NCF-3 and (d) NCF-4.

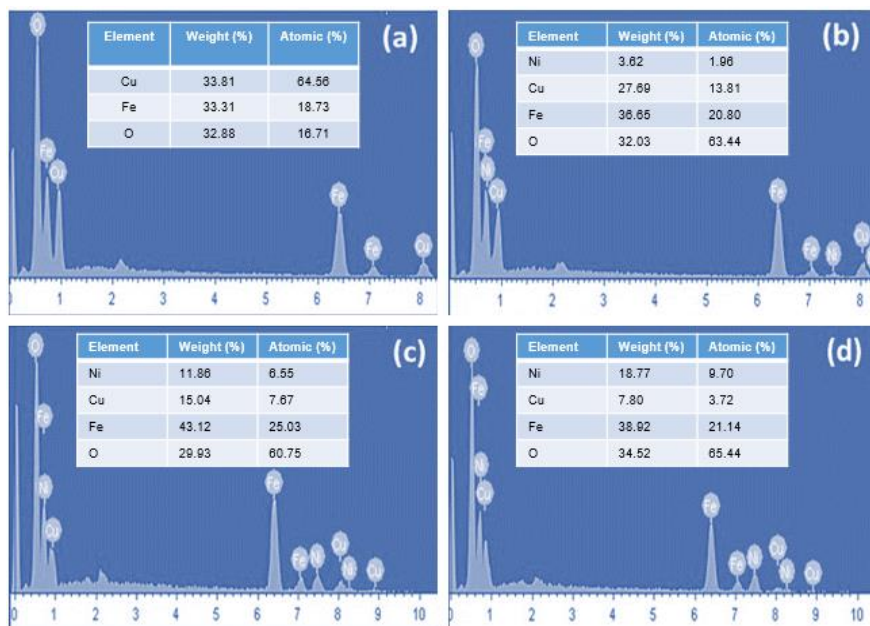

**Figure S3.** EDS analysis of  $\text{Ni}_x\text{Cu}_{1-x}\text{Fe}_2\text{O}_4$  (a) NCF-1, (b) NCF-2, (c) NCF-3 and (d) NCF-4.

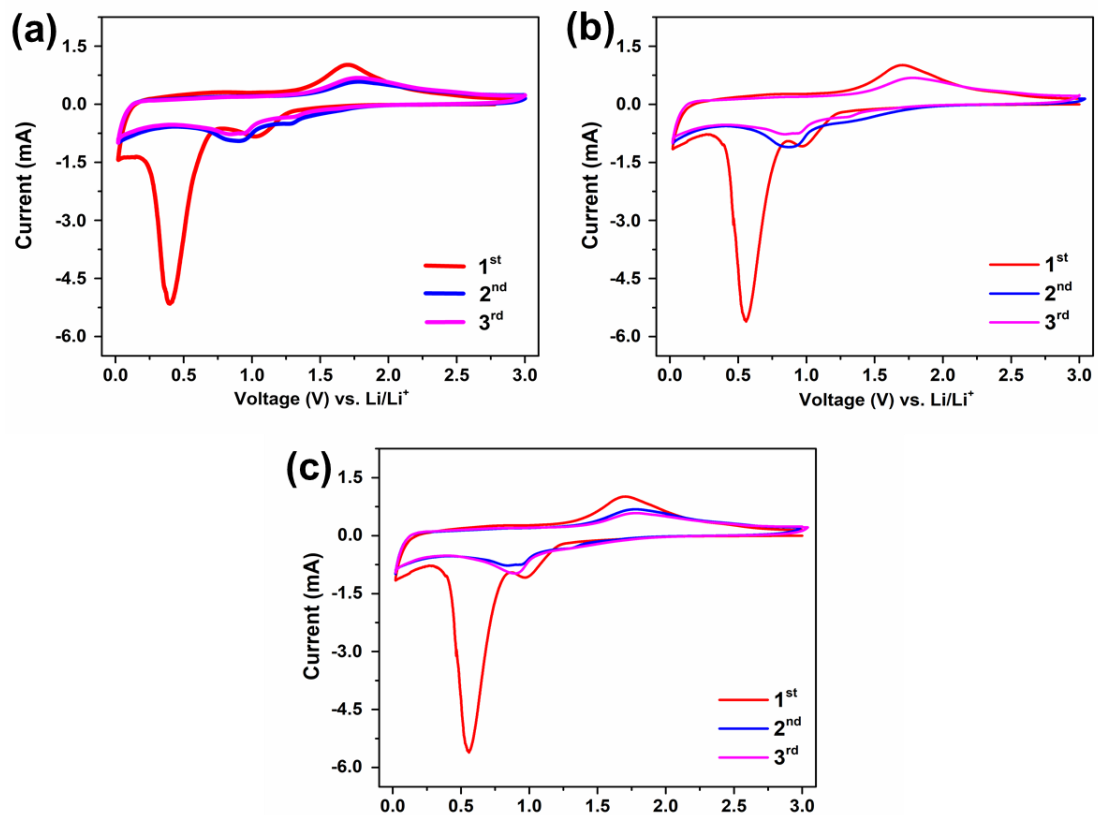

Figure S4: CV curves of  $\text{Ni}_x\text{Cu}_{1-x}\text{Fe}_2\text{O}_4$  (a) NCF-1, (b) NCF-2 and (c) NCF-3.

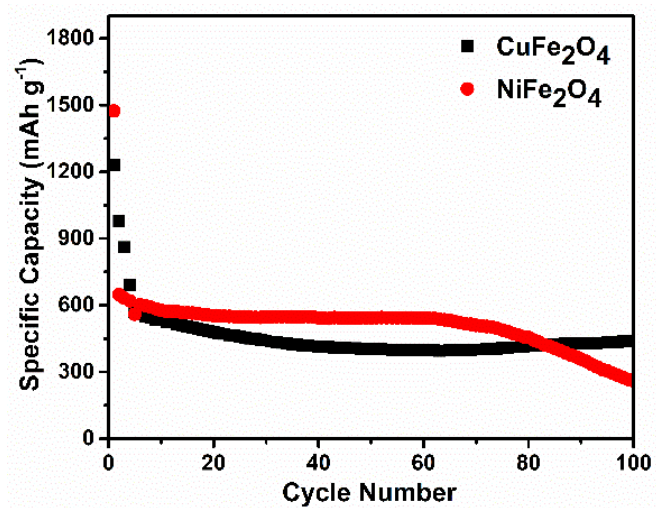

Figure S5: Cycling performance of  $\text{CuFe}_2\text{O}_4$  and  $\text{NiFe}_2\text{O}_4$ .

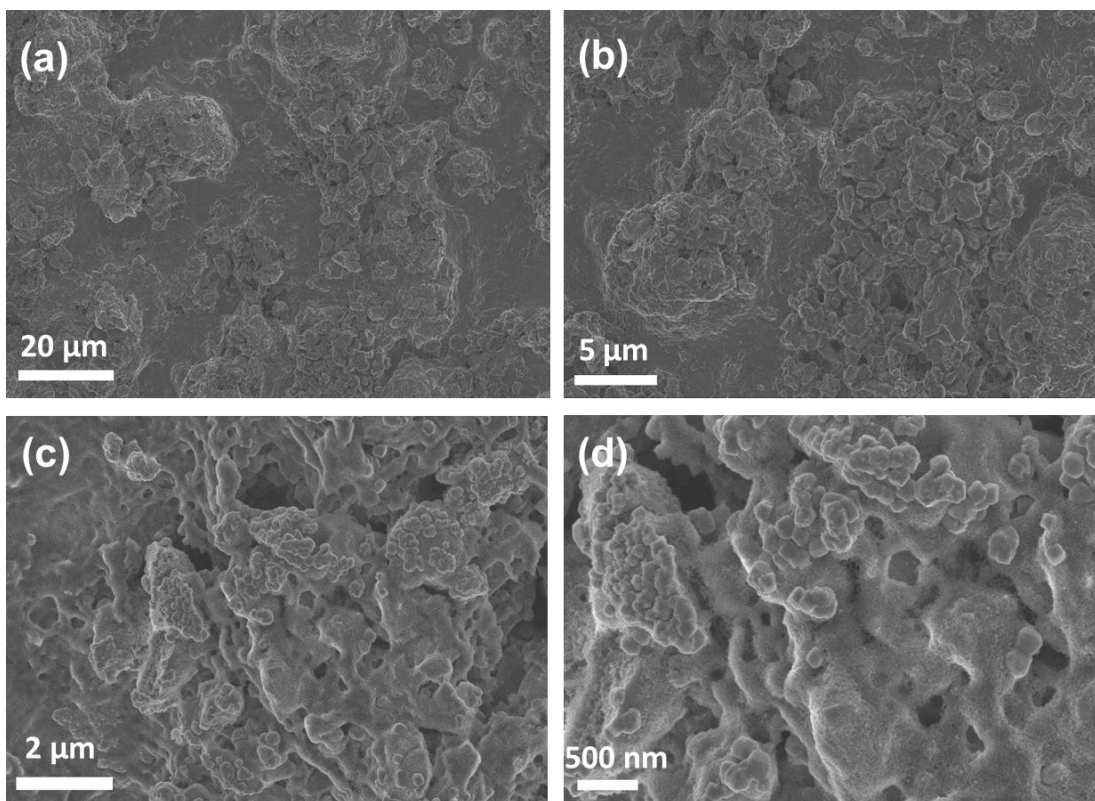

**Figure S6:** SEM images of the cycled electrode of  $\text{Ni}_x\text{Cu}_{1-x}\text{Fe}_2\text{O}_4$ .

**Table.S1:** Crystalline size, lattice constant, X-ray density, volume, hopping length  $d_B$  and  $d_A$  for pure  $\text{Ni}_x\text{Cu}_{1-x}\text{Fe}_2\text{O}_4$ .

| Samples | Crystallite size (nm) | Lattice constant ( $\text{\AA}$ ) | X-ray density ( $\text{g/cm}^3$ ) | Volume ( $\text{m}^3$ ) | $d_B$ (nm) | $d_A$ (nm) |
|---------|-----------------------|-----------------------------------|-----------------------------------|-------------------------|------------|------------|
| NCF-1   | 46.68                 | 8.353                             | 5.455                             | 582.81                  | 0.295      | 0.362      |
| NCF-2   | 41.59                 | 8.338                             | 5.473                             | 579.68                  | 0.295      | 0.361      |
| NCF-3   | 30.5                  | 8.367                             | 5.394                             | 585.75                  | 0.296      | 0.362      |
| NCF-4   | 28.55                 | 8.343                             | 5.419                             | 580.72                  | 0.295      | 0.361      |

**Table S2.** Parameters of EIS equivalent circuit of  $\text{Ni}_x\text{Cu}_{1-x}\text{Fe}_2\text{O}_4$  anode at a potential of 1.0 V.

| Parameters | Rs   | Rct | CPE <sub>dl</sub> | W    | T    |
|------------|------|-----|-------------------|------|------|
| NCF-1      | 1.71 | 409 | 17.0              | 7.70 | 13.1 |
| NCF-2      | 3.55 | 186 | 16.5              | 13.3 | 31.9 |
| NCF-3      | 3.15 | 137 | 28.8              | 17.3 | 56.4 |
| NCF-4      | 4.60 | 129 | 20.2              | 15.1 | 17.3 |

**Table S3.** Comparison of various anode materials in terms of their preparations and electrochemical performances.

| Anode                                                            | Preparation techniques | Cycling Stability                                 |                                       |               |                                    | Ref      |
|------------------------------------------------------------------|------------------------|---------------------------------------------------|---------------------------------------|---------------|------------------------------------|----------|
|                                                                  |                        | Initial Discharge capacity [mAh g <sup>-1</sup> ] | Capacity after n <sup>th</sup> cycles | Cycle Numbers | Current rate [mA g <sup>-1</sup> ] |          |
| <b>NiFe<sub>2</sub>O<sub>4</sub></b>                             | electrospinning        | 1450                                              | 550                                   | 50            | 100                                | 1        |
| <b>NiFe<sub>2</sub>O<sub>4</sub></b>                             | Hydrothermal           | 1148                                              | 501                                   | 25            | 183                                | 2        |
| <b>NiFe<sub>2</sub>O<sub>4</sub></b>                             | Arc-discharge          | 1198                                              | 200                                   | 100           | 91.5                               | 3        |
| <b>NiFe<sub>2</sub>O<sub>4</sub></b>                             | Hydrothermal           | 1209                                              | 257                                   | 50            | 100                                | 4        |
| <b>NiFe<sub>2</sub>O<sub>4</sub></b>                             | Sol-gel                | 1401                                              | 600                                   | 80            | 1000                               | 5        |
| <b>CuFe<sub>2</sub>O<sub>4</sub></b>                             | electrospinning        | 1399                                              | 489                                   | 50            | 200                                | 6        |
| <b>CuFe<sub>2</sub>O<sub>4</sub></b>                             | polymer-pyrolysis      | 1375                                              | 551                                   | 100           | 112                                | 7        |
| <b>NiFe<sub>2</sub>O<sub>4</sub></b>                             | Hydrothermal           | 1239                                              | 470                                   | 20            | 100                                | 8        |
| <b>Transition metal ferrite</b>                                  | Electrodeposition      | 452                                               | 339                                   | 100           | 100                                | 9        |
| <b>CuFe<sub>2</sub>O<sub>4</sub></b>                             | Hydrothermal           | 1571                                              | 117                                   | 100           | 141                                | 10       |
| <b>Ni<sub>x</sub>Cu<sub>1-x</sub>Fe<sub>2</sub>O<sub>4</sub></b> | Co-precipitation       | 1646                                              | 677                                   | 250           | 200                                | Our Work |

## References:

1. Cherian C T, Sundaramurthy J, Reddy M V, Kumar P S, Mani K, Pliszka D, Sow C H, Ramakrishna S and Chowdari B V R, Morphologically robust NiFe<sub>2</sub>O<sub>4</sub> nanofibers as high capacity Li-ion battery anode material, *ACS Appl. Mater. Interfaces*, 2013, **5**, 9957.
2. Mujahid M, Khan R U, Mumtaz M, Mubasher, Soomro S A, Ullah S, NiFe<sub>2</sub>O<sub>4</sub> nanoparticles/MWCNTs nanohybrid as anode material for lithium-ion battery, *Ceram. Intl.*, 2019, **45**, 8486.
3. Han D, Song G, Liu B and Yan H, Core-shell-structured nickel ferrite/onion-like carbon nanocapsules: an anode material with enhanced electrochemical performance for lithium-ion batteries, *RSC Adv.*, 2015, **5**, 42875.
4. Liu L, Sun L, Liu J, Xiao X, Hu Z, Cao X, Wang B and Liu X, Enhancing the electrochemical properties of NiFe<sub>2</sub>O<sub>4</sub> anode for lithium ion battery through a simple hydrogenation modification, *Intl. J. Hydrogen Energy*, 2014, **39**, 11258.
5. Wang N, Xu H, Chen L, Gu X, Yang J, Qian Y, A general approach for MFe<sub>2</sub>O<sub>4</sub> (M  $\frac{1}{4}$  Zn, Co, Ni) nanorods and their high performance as anode materials for lithium ion batteries, *J. Power Sources*, 2014, **247**, 163.
6. Penga S, Lia L, Srinivasan M, Electrospun CuFe<sub>2</sub>O<sub>4</sub> nanotubes as anodes for high-performance lithium-ion batteries, *J. Energy Chemistry*, 2014, **23**, 301.
7. Ding Y, Yang Y and Shao H, Synthesis and characterization of nanostructured CuFe<sub>2</sub>O<sub>4</sub> anode material for lithium ion battery, *Solid State Ionics*, 2012, 217 27.
8. Li X D, Yang W S, Li F, Evans D G, Duan X, Stoichiometric synthesis of pure NiFe<sub>2</sub>O<sub>4</sub> spinel from layered double hydroxide precursors for use as the anode material in lithium-ion batteries, *J. Physics Chem. Solids*, 2006, **67**, 1286.
9. NuLi Y N, Qin Q Z, Nanocrystalline transition metal ferrite thin films prepared by an electrochemical route for Li-ion batteries, *J. Power Sources*, 2005, **142**, 292.
10. Dong Y, Cao C, Chui Y S and Zapien J A, Facile hydrothermal synthesis of CuFeO<sub>2</sub> hexagonal platelets/rings and graphene composites as anode materials for lithium ion batteries, *Chem. Commun.*, 2014, **50**, 10151.
